# Supplementary material
Source: PubMed Central journal article supplement (PMC4925281)
Supplement: NIHMS774937-supplement-Supp_Info.pdf [file NIHMS774937-supplement-Supp_Info.pdf]

**Table S1. Determination of intracellular iron and manganese content of *B. japonicum* wild type, *fur*<sup>+</sup>, and *mur* strains. Data are expressed as average nmol metal per mg protein  $\pm$  standard deviation of triplicate samples.**

| Medium<br>( $\mu$ M) |     | Cellular Iron Content  |                         |                        |
|----------------------|-----|------------------------|-------------------------|------------------------|
|                      |     | <i>Wild type</i>       | <i>fur</i> <sup>+</sup> | <i>mur</i>             |
| Mn                   | Fe  | nmol Fe/<br>mg protein | nmol Fe/<br>mg protein  | nmol Fe/<br>mg protein |
| 0                    | 0   | 0.96 $\pm$ 0.01        | 1.05 $\pm$ 0.04         | 1.13 $\pm$ 0.06        |
| 0                    | 20  | 46 $\pm$ 3             | 46 $\pm$ 4              | 42 $\pm$ 0.1           |
| 0                    | 100 | 307 $\pm$ 5            | 306 $\pm$ 10            | 306 $\pm$ 12           |
| 20                   | 0   | 0.96 $\pm$ 0.02        | 0.93 $\pm$ 0.01         | 0.96 $\pm$ 0.02        |
| 20                   | 20  | 48 $\pm$ 3             | 48 $\pm$ 3              | 46 $\pm$ 1             |
| 20                   | 100 | 307 $\pm$ 8            | 308 $\pm$ 9             | 308 $\pm$ 12           |
| 100                  | 0   | 0.95 $\pm$ 0.00        | 0.98 $\pm$ 0.02         | 0.94 $\pm$ 0.02        |
| 100                  | 20  | 47 $\pm$ 1             | 48 $\pm$ 1              | 47 $\pm$ 1             |
| 100                  | 100 | 307 $\pm$ 7            | 307 $\pm$ 6             | 302 $\pm$ 5            |

| Medium<br>( $\mu$ M) |     | Cellular Manganese Content |                         |                        |
|----------------------|-----|----------------------------|-------------------------|------------------------|
|                      |     | <i>Wild type</i>           | <i>fur</i> <sup>+</sup> | <i>mur</i>             |
| Mn                   | Fe  | nmol Mn/<br>mg protein     | nmol Mn/<br>mg protein  | nmol Mn/<br>mg protein |
| 0                    | 0   | 0.92 $\pm$ 0.01            | 0.87 $\pm$ 0.04         | 0.90 $\pm$ 0.04        |
| 0                    | 20  | 1.15 $\pm$ 0.01            | 1.37 $\pm$ 0.01         | 1.36 $\pm$ 0.02        |
| 0                    | 100 | 1.10 $\pm$ 0.04            | 1.20 $\pm$ 0.07         | 1.27 $\pm$ 0.08        |
| 20                   | 0   | 8.6 $\pm$ 0.3              | 9.6 $\pm$ 0.1           | 9.4 $\pm$ 0.2          |
| 20                   | 20  | 9.6 $\pm$ 0.3              | 9.3 $\pm$ 0.3           | 9.8 $\pm$ 0.1          |
| 20                   | 100 | 9.8 $\pm$ 0.2              | 9.5 $\pm$ 0.2           | 9.6 $\pm$ 0.1          |
| 100                  | 0   | 13.2 $\pm$ 0.3             | 12.9 $\pm$ 0.4          | 13.0 $\pm$ 0.1         |
| 100                  | 20  | 13.6 $\pm$ 0.1             | 13.4 $\pm$ 0.3          | 13.2 $\pm$ 0.2         |
| 100                  | 100 | 13.3 $\pm$ 0.3             | 12.8 $\pm$ 0.1          | 14.0 $\pm$ 0.1         |

**Table S2. Determination of intracellular iron and manganese content of *E. coli* wild type, *mur*<sup>+</sup>, and *fur* cells. Data are expressed as average nmol metal per mg protein  $\pm$  standard deviation of triplicate samples.**

| Medium<br>( $\mu$ M) |     | Cellular Iron Content  |                         |                        |
|----------------------|-----|------------------------|-------------------------|------------------------|
|                      |     | <i>Wild type</i>       | <i>mur</i> <sup>+</sup> | <i>fur</i>             |
| Mn                   | Fe  | nmol Fe/<br>mg protein | nmol Fe/<br>mg protein  | nmol Fe/<br>mg protein |
| 0                    | 0   | 2.02 $\pm$ 0.02        | 2.22 $\pm$ 0.06         | 2.02 $\pm$ 0.08        |
| 0                    | 20  | 214 $\pm$ 4            | 216 $\pm$ 7             | 238 $\pm$ 1            |
| 0                    | 100 | 1054 $\pm$ 0           | 1150 $\pm$ 9            | 1013 $\pm$ 7           |
| 20                   | 0   | 2.18 $\pm$ 0.09        | 2.27 $\pm$ 0.11         | 2.34 $\pm$ 0.05        |
| 20                   | 20  | 228 $\pm$ 3            | 225 $\pm$ 1             | 233 $\pm$ 4            |
| 20                   | 100 | 1268 $\pm$ 52          | 1258 $\pm$ 42           | 1226 $\pm$ 42          |
| 100                  | 0   | 2.09 $\pm$ 0.01        | 2.07 $\pm$ 0.05         | 2.09 $\pm$ 0.14        |
| 100                  | 20  | 274 $\pm$ 2            | 267 $\pm$ 5             | 272 $\pm$ 12           |
| 100                  | 100 | 1259 $\pm$ 45          | 1246 $\pm$ 4            | 1247 $\pm$ 34          |

| Medium<br>( $\mu$ M) |     | Cellular Manganese Content |                         |                        |
|----------------------|-----|----------------------------|-------------------------|------------------------|
|                      |     | <i>Wild type</i>           | <i>mur</i> <sup>+</sup> | <i>fur</i>             |
| Mn                   | Fe  | nmol Mn/<br>mg protein     | nmol Mn/<br>mg protein  | nmol Mn/<br>mg protein |
| 0                    | 0   | 0.14 $\pm$ 0.01            | 0.15 $\pm$ 0.00         | 0.09 $\pm$ 0.02        |
| 0                    | 20  | 0.39 $\pm$ 0.00            | 0.45 $\pm$ 0.00         | 0.19 $\pm$ 0.00        |
| 0                    | 100 | 0.96 $\pm$ 0.04            | 0.92 $\pm$ 0.02         | 0.62 $\pm$ 0.03        |
| 20                   | 0   | 4.5 $\pm$ 0.2              | 7.7 $\pm$ 0.3           | 2.6 $\pm$ 0.2          |
| 20                   | 20  | 31 $\pm$ 3                 | 27 $\pm$ 2              | 22 $\pm$ 2             |
| 20                   | 100 | 82 $\pm$ 2                 | 87 $\pm$ 2              | 80 $\pm$ 8             |
| 100                  | 0   | 69 $\pm$ 3                 | 74 $\pm$ 1              | 20 $\pm$ 1             |
| 100                  | 20  | 237 $\pm$ 5                | 241 $\pm$ 13            | 165 $\pm$ 2            |
| 100                  | 100 | 276 $\pm$ 6                | 263 $\pm$ 1             | 181 $\pm$ 6            |

Fig S1. Metal binding residues of Mur and Fur are conserved.

Amino acid sequences and alignment of *E. coli* Fur (EcFur), *Magnetospirillum. gryphiswaldense* Fur (MgFur), and *B. japonicum* Mur (BjMur). Metal binding site 1 (bold) and metal binding site 2 (underlined) are shown as determined by crystal structure of *M. gryphiswaldense* Fur.

Fig S2. Western blot analysis of Mur or Fur expression in *B. japonicum* and *E. coli*.

15 µg of *B. japonicum* whole cell lysates or 5 µg of *E. coli* whole cell lysates were loaded per lane of a 15% SDS-PAGE gel and analyzed using either anti-Mur antibodies (Mur) or anti-Fur antibodies (Fur). (A) Metal dependent expression of Fur in Wt *E. coli*, Mur in ecMur, Fur in bjFur, or Mur in Wt *B. japonicum*. Cells were grown in the presence (+) or absence (-) of 20 µM MnCl<sub>2</sub> and FeCl<sub>3</sub>. (B) Fur and Mur expression in Wt *E. coli*, ecMur (*mur*<sup>+</sup>), JW0669 (*fur*<sup>-</sup>) Wt *B. japonicum*, bjFur (*fur*<sup>+</sup>), and GEM4 (*mur*<sup>-</sup>) strains.

Fig S3. Metal dependent gene expression of *mnoP* and *fiu* in *B. japonicum* and *E. coli* cells.

(A) Analysis of *mnoP* mRNA by qPCR in *B. japonicum* wild type (Wt) or *mur* cells grown in the presence or absence of 20 µM MnCl<sub>2</sub> or 20 µM FeCl<sub>3</sub>. (B) Analysis of *fiu* mRNA by qPCR in *B. japonicum* wild type (Wt) or *mur* cells grown as described above. (C) Analysis of *fiu* mRNA by qPCR in *E. coli* parent strain (Wt) or *fur* cells grown as described above. (D) Analysis of *mnoP* mRNA by qPCR in *E. coli* strain expressing Mur (*mur*<sup>+</sup>) or *fur* cells grown as describe above. The data are expressed as the relative starting quantity (SQ) of *mntH* mRNA normalized to the housekeeping gene *gapA*, and are presented as the average of triplicate samples with the error bars representing the standard deviation.

|       |                                                                                                |     |
|-------|------------------------------------------------------------------------------------------------|-----|
| EcFur | -----MTDNNTALKKAGLKVTLPRLKILEVLQEPDNHHVSAEDLYKRLIDMGEE                                         | 49  |
| MgFur | -----MVSRIEQRCIDKGMKMTDQRRVIAQVLSDS-ADHPDVEEVYRRATAKDPR                                        | 49  |
| BjMur | MTALKPSSASKASGIEARCAATGMRMTEQRRVIARVLAEA-VDHPDVEELYRRCVAVDDK                                   | 59  |
| EcFur | IGLATVYRVLNQFDDAGIVTRHNFEGGKSVFELTQQHH <u>HD</u> HLICLDCGKVI <u>EF</u> SDDSI <u>EA</u>         | 109 |
| MgFur | ISIATVYRTVRLFEEESILERHDFGDGRARY <u>EE</u> APSE <u>HD</u> HLIDVNSARVI <u>EF</u> TSPET <u>EA</u> | 109 |
| BjMur | ISISTVYRTVKLFEDAGIERHDFREGRARY <u>ET</u> MRDS <u>HD</u> HLINLRDGKVI <u>EF</u> TSEET <u>EK</u>  | 119 |
| EcFur | RQREIAAKHGIRLTN <u>HS</u> LYLYGHCAEGDCREDEHAHEGK                                               | 148 |
| MgFur | LQREIARKHGFRLV <u>GH</u> RLELYGVPLTSGGDSDDK-----                                               | 143 |
| BjMur | LQAEIARKLGYKLVD <u>H</u> RLELYCVPLDDDKPTS-----                                                 | 151 |

Figure S1

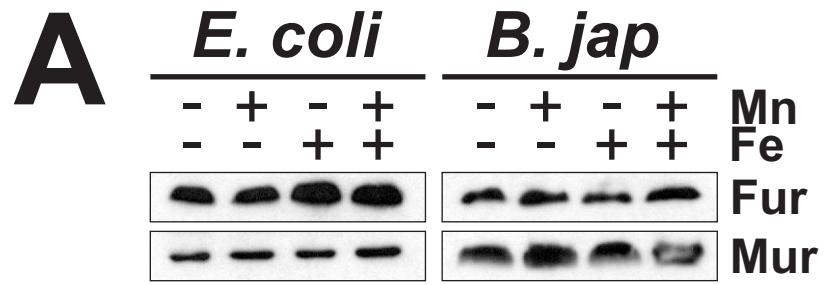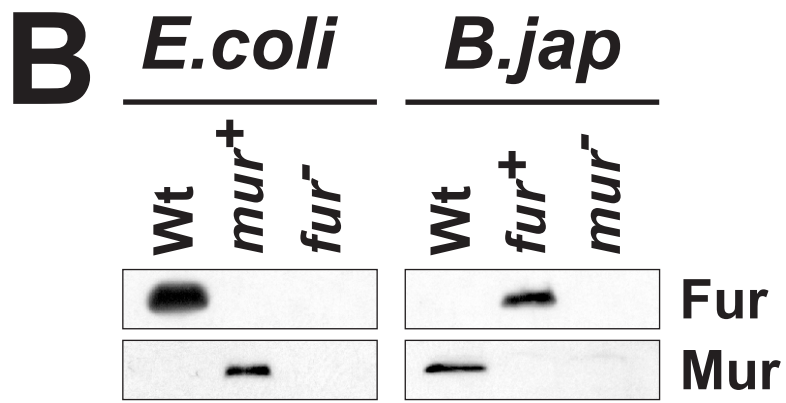

Figure S2

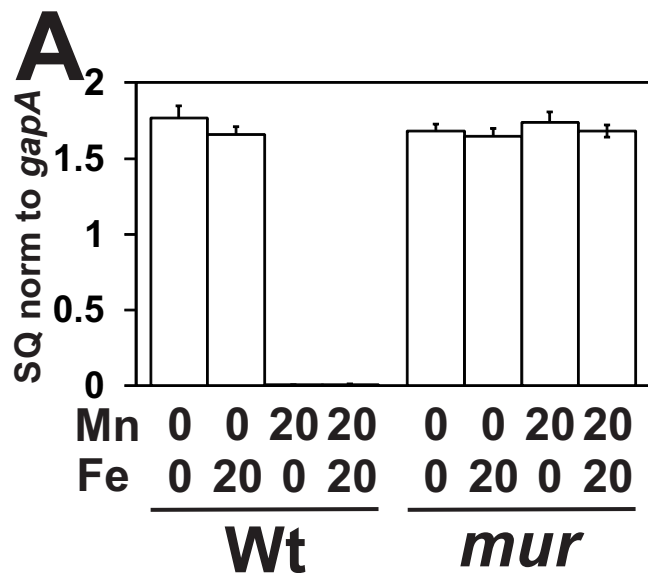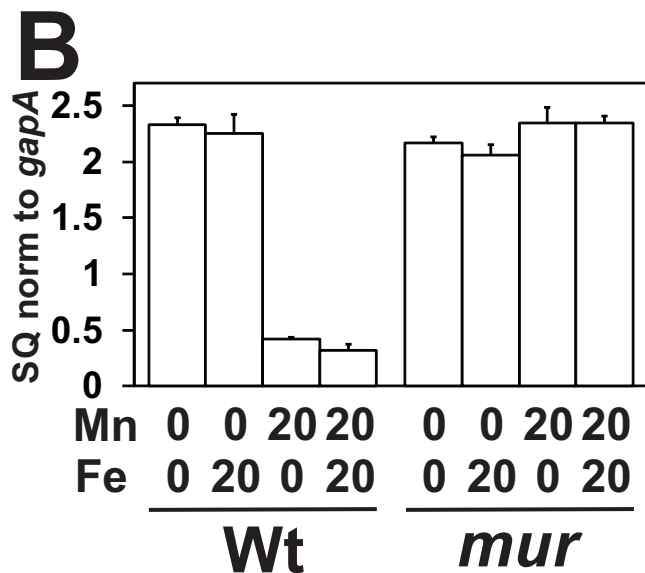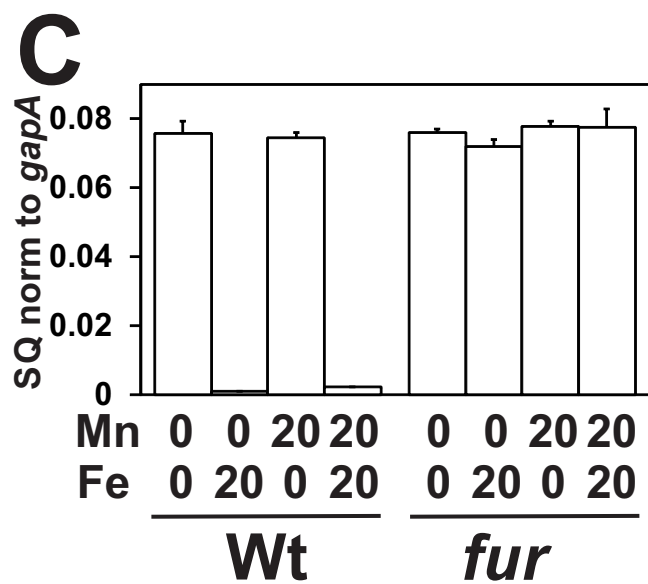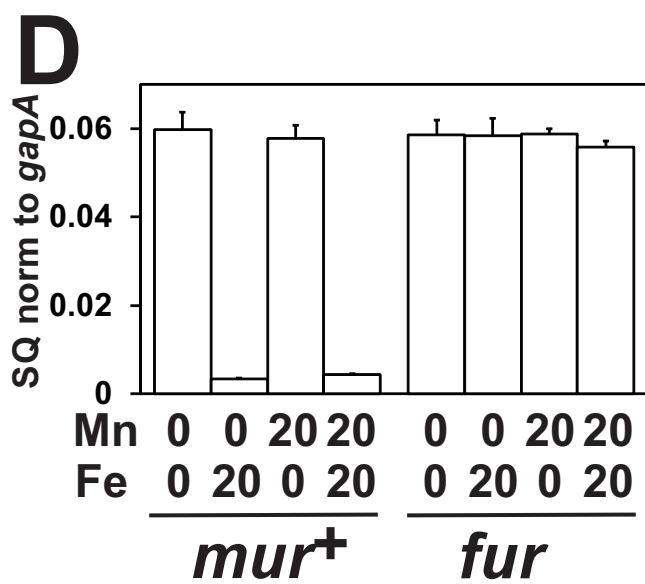

FigureS3
